# Supplementary material
Source: Springer Nature journal article supplement (https://www.springermedizin.de/resource/supplementary/12888_2007_449_MOESM4_ESM.pdf/9483410)

Motives of alcohol consumption

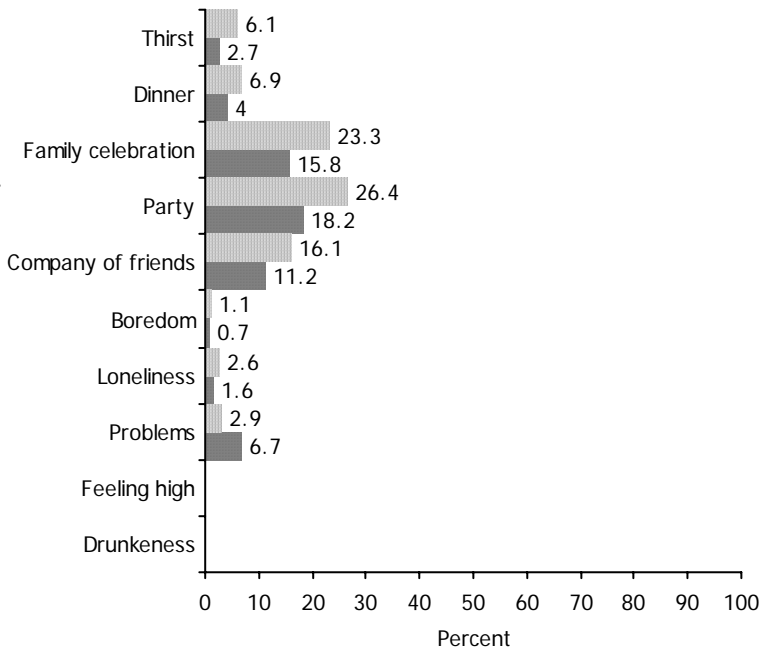

■ Females (1994) ■ Males (1994)

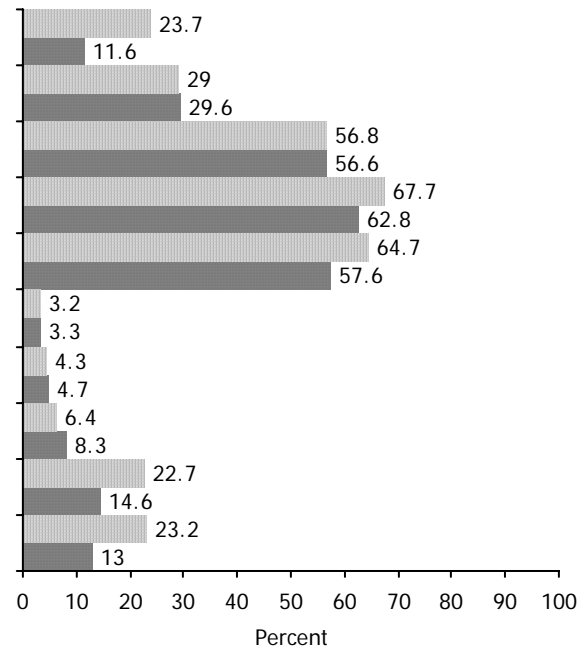

■ Females (1997) ■ Males (1997)

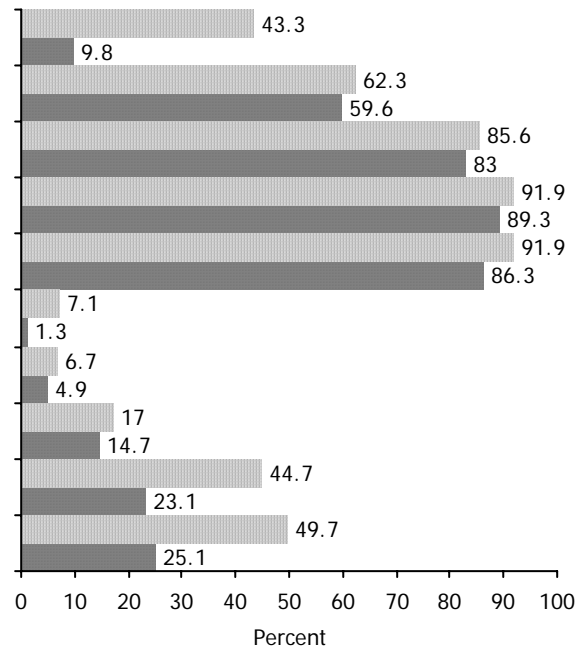

■ Females (2001) ■ Males (2001)

Supplement: MOESM4 [file 9483410]
